# Supplementary material
Source: MDPI journal article supplement (https://www.mdpi.com/search?q=molbank-2022-M1497)
Supplement: s002 [file molbank-2022-M1497-s002-mod.mol]

KingDraw KingDraw.mol
  corina  11172211243D 1   1.00000     0.00000 
CORINA 4.4.0 0026  12.08.2021
 20 21  0  0  0  0  0  0  0  0999 V2000
   -1.0440    0.7221    3.1046 O   0  0  0  0  0  0  0  0  0  0  0  0
   -2.1275    0.7112    2.4924 O   0  0  0  0  0  0  0  0  0  0  0  0
   -2.1347    1.4337    1.3659 C   0  0  0  0  0  0  0  0  0  0  0  0
   -0.7348    2.0192    1.2692 C   0  0  0  0  0  0  0  0  0  0  0  0
   -0.0858    1.4551    2.5232 C   0  0  0  0  0  0  0  0  0  0  0  0
    1.0497    1.6302    2.9107 O   0  0  0  0  0  0  0  0  0  0  0  0
   -0.0187    1.5258    0.0104 C   0  0  0  0  0  0  0  0  0  0  0  0
    0.0021   -0.0041    0.0020 C   0  0  0  0  0  0  0  0  0  0  0  0
    0.7182   -0.4975   -1.2568 C   0  0  0  0  0  0  0  0  0  0  0  0
    0.7390   -2.0273   -1.2652 C   0  0  0  0  0  0  0  0  0  0  0  0
    1.4551   -2.5207   -2.5240 C   0  0  0  0  0  0  0  0  0  0  0  0
    0.8060   -1.9567   -3.7780 C   0  0  0  0  0  0  0  0  0  0  0  0
    1.7630   -1.2241   -4.3599 O   0  0  0  0  0  0  0  0  0  0  0  0
    2.8466   -1.2124   -3.7480 O   0  0  0  0  0  0  0  0  0  0  0  0
    2.8550   -1.9353   -2.6207 C   0  0  0  0  0  0  0  0  0  0  0  0
    3.7757   -2.0889   -1.8469 O   0  0  0  0  0  0  0  0  0  0  0  0
   -0.3292   -2.1324   -4.1659 O   0  0  0  0  0  0  0  0  0  0  0  0
    1.4949   -4.0496   -2.5661 C   0  0  0  0  0  0  0  0  0  0  0  0
   -0.7746    3.5481    1.3113 C   0  0  0  0  0  0  0  0  0  0  0  0
   -3.0557    1.5879    0.5925 O   0  0  0  0  0  0  0  0  0  0  0  0
  1  2  1  0
  2  3  1  0
  3  4  1  0
  4  5  1  0
  5  1  1  0
  5  6  2  0
  4  7  1  0
  7  8  1  0
  8  9  1  0
  9 10  1  0
 10 11  1  0
 11 12  1  0
 12 13  1  0
 13 14  1  0
 14 15  1  0
 15 11  1  0
 15 16  2  0
 12 17  2  0
 11 18  1  0
 19  4  1  0
  3 20  2  0
M  END
$$$$
