# Supplementary material
Source: MDPI journal article supplement (https://www.mdpi.com/search?q=molbank-2022-M1497)
Supplement: s002 [file molbank-2022-M1497-s002.mol]

KingDraw KingDraw.mol
KingDraw2D

 20 21  0  0  0  0  0  0  0  0999 V2000
   13.7648  -12.8790    0.0000 O   0  0  0  0  0  0  0  0  0  0  0  0
   13.7648  -13.3853    0.0000 O   0  0  0  0  0  0  0  0  0  0  0  0
   14.2462  -13.5417    0.0000 C   0  0  0  0  0  0  0  0  0  0  0  0
   14.5438  -13.1322    0.0000 C   0  0  0  0  0  0  0  0  0  0  0  0
   14.2462  -12.7226    0.0000 C   0  0  0  0  0  0  0  0  0  0  0  0
   14.4027  -12.2411    0.0000 O   0  0  0  0  0  0  0  0  0  0  0  0
   14.9822  -13.3853    0.0000 C   0  0  0  0  0  0  0  0  0  0  0  0
   14.9822  -13.8915    0.0000 C   0  0  0  0  0  0  0  0  0  0  0  0
   15.4206  -14.1446    0.0000 C   0  0  0  0  0  0  0  0  0  0  0  0
   15.4206  -14.6509    0.0000 C   0  0  0  0  0  0  0  0  0  0  0  0
   15.8590  -14.9040    0.0000 C   0  0  0  0  0  0  0  0  0  0  0  0
   16.1566  -15.3135    0.0000 C   0  0  0  0  0  0  0  0  0  0  0  0
   16.6381  -15.1571    0.0000 O   0  0  0  0  0  0  0  0  0  0  0  0
   16.6381  -14.6509    0.0000 O   0  0  0  0  0  0  0  0  0  0  0  0
   16.1566  -14.4944    0.0000 C   0  0  0  0  0  0  0  0  0  0  0  0
   16.0002  -14.0130    0.0000 O   0  0  0  0  0  0  0  0  0  0  0  0
   16.0002  -15.7950    0.0000 O   0  0  0  0  0  0  0  0  0  0  0  0
   15.4206  -15.1571    0.0000 C   0  0  0  0  0  0  0  0  0  0  0  0
   14.9822  -12.8790    0.0000 C   0  0  0  0  0  0  0  0  0  0  0  0
   14.4027  -14.0232    0.0000 O   0  0  0  0  0  0  0  0  0  0  0  0
  1  2  1  0
  2  3  1  0
  3  4  1  0
  4  5  1  0
  5  1  1  0
  5  6  2  0
  4  7  1  0
  7  8  1  0
  8  9  1  0
  9 10  1  0
 10 11  1  0
 11 12  1  0
 12 13  1  0
 13 14  1  0
 14 15  1  0
 15 11  1  0
 15 16  2  0
 12 17  2  0
 11 18  1  0
 19  4  1  0
  3 20  2  0
M  END
